# Supplementary material for: Spermidine Is an Intercellular Signal Modulating T3SS Expression in Pseudomonas aeruginosa
Source: PubMed Central journal article supplement (PMC9241758; doi:10.1128/spectrum.00644-22), 2022-04-18
Supplement: spectrum.00644-22-s001.pdf [file spectrum.00644-22-s001.pdf]

## **Supplementary Information**

Spermidine is an intercellular signal modulating T3SS expression in *Pseudomonas aeruginosa*

### **Content:**

**Supplementary Table S1.** Bacterial strains and plasmids used in this study.

**Supplementary Table S2.** Primers used in this study

**Supplementary Table S3.** Genes regulated by SpeE

**Supplementary Figure S1.** Bacterial growth of *Pseudomonas aeruginosa* PAO1 and its derivatives in different media

**Supplementary Figure S2.** Sequence alignment of SpuE and PotD from *Pseudomonas aeruginosa* PAO1 with the spermidine binding protein PotD from *Escherichia coli*

**Supplementary Figure S3.** Transcriptional expression of *exsCEBA* in *Pseudomonas aeruginosa* PAO1 and its derivatives in MMN medium

**Supplementary Figure S4.** Transcriptional expression of *exsCEBA* in *Pseudomonas aeruginosa* PAO1 and its derivatives with or without putrescine

**Supplementary Figure S5.** Gene ontology analysis of differentially expressed genes between *Pseudomonas aeruginosa* PAO1 and mutant  $\Delta$ *speE*

**Supplementary Figure S6.** Interaction of spermidine-related genes with other T3SS regulatory mechanisms in *Pseudomonas aeruginosa* PAO1

**Supplementary Figure S7.** Full images of the Western blots used in this study

**Table S1.** Bacterial strains and plasmids used in this study

| Strains or plasmids                       | Relevant description*                                                                                                                                                                                                                                              | Source or reference |
|-------------------------------------------|--------------------------------------------------------------------------------------------------------------------------------------------------------------------------------------------------------------------------------------------------------------------|---------------------|
| <b>Bacterial strains</b>                  |                                                                                                                                                                                                                                                                    |                     |
| <i>Escherichia coli</i>                   |                                                                                                                                                                                                                                                                    |                     |
| DH5 $\alpha$                              | F- $\phi$ 80d <i>lacZ</i> $\Delta$ M15 $\Delta$ ( <i>lacZYA-argF</i> ) U169 end A1<br><i>recA1 hsdR17</i> (r <sub>k</sub> <sup>-</sup> m <sub>k</sub> <sup>+</sup> ) <i>supE44</i> $\lambda$ - <i>thi-1 gyrA96 relA1</i><br><i>phoA</i> for plasmid transformation | Lab collection      |
| pRK2013                                   | <i>Thr leu thi recA hsdR hsdM pro</i> , Km <sup>r</sup>                                                                                                                                                                                                            | Lab collection      |
| <i>Pseudomonas aeruginosa</i>             |                                                                                                                                                                                                                                                                    |                     |
| PAO1                                      | Prototrophic laboratory strain                                                                                                                                                                                                                                     | Lab collection      |
| $\Delta$ <i>speA</i>                      | <i>speA</i> in-frame deletion mutant from PAO1                                                                                                                                                                                                                     | This study          |
| $\Delta$ <i>speC</i>                      | <i>speC</i> in-frame deletion mutant from PAO1                                                                                                                                                                                                                     | This study          |
| $\Delta$ <i>speD</i>                      | <i>speD</i> in-frame deletion mutant from PAO1                                                                                                                                                                                                                     | This study          |
| $\Delta$ <i>speE</i>                      | <i>speE</i> in-frame deletion mutant from PAO1                                                                                                                                                                                                                     | This study          |
| $\Delta$ <i>spuE</i>                      | <i>spuE</i> in-frame deletion mutant from PAO1                                                                                                                                                                                                                     | This study          |
| $\Delta$ <i>potD</i>                      | <i>potD</i> in-frame deletion mutant from PAO1                                                                                                                                                                                                                     | This study          |
| $\Delta$ <i>aguA</i>                      | <i>aguA</i> in-frame deletion mutant from PAO1                                                                                                                                                                                                                     | This study          |
| $\Delta$ <i>aguB</i>                      | <i>aguB</i> in-frame deletion mutant from PAO1                                                                                                                                                                                                                     | This study          |
| $\Delta$ <i>speA</i> $\Delta$ <i>potD</i> | <i>speA</i> and <i>potD</i> in-frame deletion mutant from PAO1                                                                                                                                                                                                     | This study          |
| $\Delta$ <i>speD</i> $\Delta$ <i>potD</i> | <i>speD</i> and <i>potD</i> in-frame deletion mutant from PAO1                                                                                                                                                                                                     | This study          |
| $\Delta$ <i>spuE</i> $\Delta$ <i>potD</i> | <i>spuE</i> and <i>potD</i> in-frame deletion mutant from PAO1                                                                                                                                                                                                     | This study          |

---

|                                  |                                                                                                                   |            |
|----------------------------------|-------------------------------------------------------------------------------------------------------------------|------------|
| $\Delta speE \Delta spuE$        | <i>speE</i> and <i>spuE</i> in-frame deletion mutant from PAO1                                                    | This study |
| $\Delta vfr$                     | <i>vfr</i> in-frame deletion mutant from PAO1                                                                     | This study |
| $\Delta gacA$                    | <i>gacA</i> in-frame deletion mutant from PAO1                                                                    | This study |
| PAO1pClacZ                       | <i>lacZ</i> fused to the <i>exsCEBA</i> promoter and integrated at<br>the <i>attB</i> site of the PAO1 chromosome | (1)        |
| $\Delta speA pClacZ$             | <i>speA</i> in-frame deletion mutant from PAO1pClacZ                                                              | This study |
| $\Delta speC pClacZ$             | <i>speC</i> in-frame deletion mutant from PAO1pClacZ                                                              | This study |
| $\Delta speD pClacZ$             | <i>speD</i> in-frame deletion mutant from PAO1pClacZ                                                              | This study |
| $\Delta speE pClacZ$             | <i>speE</i> in-frame deletion mutant from PAO1pClacZ                                                              | This study |
| $\Delta spuE pClacZ$             | <i>spuE</i> in-frame deletion mutant from PAO1pClacZ                                                              | This study |
| $\Delta potD pClacZ$             | <i>potD</i> in-frame deletion mutant from PAO1pClacZ                                                              | This study |
| $\Delta aguA pClacZ$             | <i>aguA</i> in-frame deletion mutant from PAO1pClacZ                                                              | This study |
| $\Delta aguB pClacZ$             | <i>aguB</i> in-frame deletion mutant from PAO1pClacZ                                                              | This study |
| $\Delta speA \Delta potD pClacZ$ | <i>speA</i> and <i>potD</i> in-frame deletion mutant from<br>PAO1pClacZ                                           | This study |
| $\Delta speD \Delta potD pClacZ$ | <i>speA</i> and <i>potD</i> in-frame deletion mutant from<br>PAO1pClacZ                                           | This study |
| $\Delta spuE \Delta potD pClacZ$ | <i>spuE</i> and <i>potD</i> in-frame deletion mutant from<br>PAO1pClacZ                                           | This study |
| $\Delta speE \Delta spuE pClacZ$ | <i>speE</i> and <i>spuE</i> in-frame deletion mutant from                                                         | This study |

---

---

PAO1pClacZ

**Plasmids**

|                    |                                                                   |                |
|--------------------|-------------------------------------------------------------------|----------------|
| pBBR1-MCS5         | Broad-host-range expression vector, Gm <sup>r</sup>               | Lab collection |
| pBBR1- <i>speD</i> | <i>speD</i> encoding region cloned in pBBR1-MCS5, Gm <sup>r</sup> | This study     |
| pBBR1- <i>speE</i> | <i>speE</i> encoding region cloned in pBBR1-MCS5, Gm <sup>r</sup> | This study     |
| pBBR1- <i>spuE</i> | <i>spuE</i> encoding region cloned in pBBR1-MCS5, Gm <sup>r</sup> | This study     |
| pBBR1- <i>potD</i> | <i>potD</i> encoding region cloned in pBBR1-MCS5, Gm <sup>r</sup> | This study     |

---

\*: Gm<sup>r</sup>, gentamicin resistance; Kan<sup>r</sup>, kanamycin resistance.

**REFERENCE**

1. Zhou L, Wang J, Zhang LH. 2007. Modulation of bacterial type III secretion system by a spermidine transporter dependent signaling pathway. PLoS One 2:e1291.

**Table S2.** Primers used in this study

---

| Primer                       | Sequence (5'-3')                          |
|------------------------------|-------------------------------------------|
| <b>For in-frame deletion</b> |                                           |
| <i>speA</i> -up-F            | gagctcgggtaccgggatccCGCCTGTCGGCGACGGGA    |
| <i>speA</i> -up-R            | agGCGCGGTGATCTCCTCAAT                     |
| <i>speA</i> -down-F          | ttgaggagatcaccgcCTGGCTAGCCCGTCGGCG        |
| <i>speA</i> -down-R          | acgacggccagtccaagcttGGTCGCGGCAAGGCCCTG    |
| <i>speC</i> -up-F            | gagctcgggtaccgggatccCGCCCAGGTGACCCAGCT    |
| <i>speC</i> -up-R            | tgcgGGTTGGGACTCCCAATGGC                   |
| <i>speC</i> -down-F          | attgggagtccaaccCGCAGTCGCCTCTGCTACG        |
| <i>speC</i> -down-R          | acgacggccagtccaagcttACGGGTTGTAGGCAATTTCCC |
| <i>speD</i> -up-F            | CGGGATCCGCCCAAGGTGTTACGAAGATCC            |
| <i>speD</i> -up-R            | TTCTTCCTCGTGTGCGACGTGGGGA ACTCTCTCGG      |
| <i>speD</i> -down-F          | CCGAGAGAGTTCCCCACGTCGCACACGAGGAAGAA       |
| <i>speD</i> -down-R          | CCCAAGCTTAGGCGCTGTACCAGGGCCA              |
| <i>speE</i> -up-F            | gagctcgggtaccgggatccCCGGATTGGCGGCCACCA    |
| <i>speE</i> -up-R            | ttcttgggaagcgGGGCCGGGATCTCCCTGG           |
| <i>speE</i> -down-F          | cggcccCGCTTACCAAGAAGGGCC                  |
| <i>speE</i> -down-R          | acgacggccagtccaagcttCCTGCTCCTGGCTGATCGC   |
| <i>aguA</i> -up-F            | gagctcgggtaccgggatccGGACCAGTGTTCCCCGA     |

---

---

|                     |                                            |
|---------------------|--------------------------------------------|
| <i>aguA</i> -up-R   | gCGCTGCTCCTGAAATCGTTG                      |
| <i>aguA</i> -down-F | aacgatttcaggagcagcgCGGGCATCCCGCAGGGCG      |
| <i>aguA</i> -down-R | acgacggccagtccaagcttGATGGCGAAGGTTCTACCGC   |
| <i>aguB</i> -up-F   | gagctcggtagccgggatccCGGCGGCCCGCCAACTGA     |
| <i>aguB</i> -up-R   | atcgtttcccaggccGGAGCACCTCGTGTGCTGG         |
| <i>aguB</i> -down-F | ctccGGCCTCGGAAACGATCC                      |
| <i>aguB</i> -down-R | acgacggccagtccaagcttTCTTGCGTGCCACCTGGT     |
| <i>spuE</i> -up-F   | CGGGATCCCTGTATACCTTCCCCGACCTGCC            |
| <i>spuE</i> -up-R   | ACCGGGCGGAATTTGAACGTCCGACTCCTGTTCCGG       |
| <i>spuE</i> -down-F | CCGGAACAGGAGTCGGACGTTCAAATCCGCCCGGT        |
| <i>spuE</i> -down-R | CCCAAGCTTTTGCCTTGGCGTACTGGG                |
| <i>potD</i> -up-F   | CGGGATCCCATGAGCCTGGGCATGCTCTC              |
| <i>potD</i> -up-R   | CGTCGATAGCGGTGCGGAGGTTCTTGTACGGGGT         |
| <i>potD</i> -down-F | ACCCCGTAACAAGGAACCTCCGCACCGCTATCGACG       |
| <i>potD</i> -down-R | CCCAAGCTTCGAGCAACTGGCGATAGCCG              |
| <i>vfr</i> -up-F    | gagctcggtagccgggatccCGGCCTCGAGGAAGGCTT     |
| <i>vfr</i> -up-R    | ttttcatgggtgctgtGCCCGAGTCCCGAAAGAA         |
| <i>vfr</i> -down-F  | ggcACAGCACCCATGAAAAAGGCC                   |
| <i>vfr</i> -down-R  | acgacggccagtccaagcttCGAGGCGGGGCGATCGG      |
| <i>gacA</i> -up-F   | gagctcggtagccgggatccCATCAGGAAGCAATCCTGGATC |

---

---

*gacA*-up-R                   aaaacggcgctcatGCTGCACCTCGTCGCGCA

*gacA*-down-F                 tgcagcATGAGCGCCGTTTTTCGACG

*gacA*-down-R                 acgacggccagtgccaagcttCAGGGCCGCGTACGGTTG

**For in *trans* complementation**

pBBR1-*speD*-F               gtcgacggatcgcgataagcttAAAAGGGGCGCAAACCTCTG

pBBR1-*speD*-R               cgctctagaactagtgatccTCAGCGCGGCATGTTGCG

pBBR1-*speE*-F               gtcgacggatcgcgataagcttCCGTTGGCCCGGAAGCTG

pBBR1-*speE*-R               cgctctagaactagtgatccTCAGTCGTTGTCCTGCTTGCC

pBBR1-*spuE*-F               gtcgacggatcgcgataagcttTCGTCCAGACGCTTCCTCC

pBBR1-*spuE*-R               cgctctagaactagtgatccTTATTTGCCGGTCTTGATCCG

pBBR1-*potD*-F               gtcgacggatcgcgataagcttTGATGGCCTTCACCCTGTCC

pBBR1-*potD*-R               cgctctagaactagtgatccTCAGCGCAGCTTGATCTCTGT

**For RT-qPCR**

*rpoD*-F                       GCGAAGAAGGAAATGGTC

*rpoD*-R                       CGTAGGTGGAGAACTTGTA

*speA*-F                       CAGTGCTACTTCGCTATCT

*speA*-R                       CTTGTCGTTGAGTTCGTC

*speC*-F                       TGGACAAGGTGATGAAGA

*speC*-R                       TCGTAGAAGTAGCGGATG

*aguA*-F                       TGAACTTCCTGATCGTCAA

---

---

|                |                        |
|----------------|------------------------|
| <i>aguA</i> -R | GGTGATGCAATGGATGTT     |
| <i>aguB</i> -F | CTATGGTTCTTCGTTTCATCG  |
| <i>aguB</i> -R | AGGTGTGGACAAGGATAC     |
| <i>speD</i> -F | ATCTACGACATCTGCTACG    |
| <i>speD</i> -R | GACAACATCGGTAAGAATCTG  |
| <i>speE</i> -F | AGCGATTATCAGGAAACTCT   |
| <i>speE</i> -R | TCTCGTGGTAGATGAACTC    |
| <i>potD</i> -F | CGTCGAGCTATATCAAGGA    |
| <i>potD</i> -R | TGTGGATCACCATGTTGT     |
| <i>spuE</i> -F | CAACATTCCATTGGCAAGA    |
| <i>spuE</i> -R | TGTAATCGGTCCAGTTATAGAT |
| <i>cyaB</i> -F | TGTTCTTCTCCGACATCC     |
| <i>cyaB</i> -R | CGTTGAGGTAGTTGTTGAG    |
| <i>vfr</i> -F  | TATTACCCACACACCCAAA    |
| <i>vfr</i> -R  | GTTGAGGTAGCCGATGAT     |
| <i>gacA</i> -F | ATCAAGGTCGTGGTAGTC     |
| <i>gacA</i> -R | ATCTGCGGGCTGATATAG     |
| <i>gacS</i> -F | GACTACCTCACGACCATC     |
| <i>gacS</i> -R | CAGTTCCAGTTGCTTCTC     |
| <i>ladS</i> -F | TGGTGATGCTGATCTACAA    |

---



---

|                |                        |
|----------------|------------------------|
| <i>ladS</i> -R | AACGAAGCGATATAGAGGAT   |
| <i>exsA</i> -F | CTGCCCAGTTTCTACAAG     |
| <i>exsA</i> -R | CACAAGCAATTCCTTCAAC    |
| <i>exsC</i> -F | CCGTTTCGATCTGCATTTC    |
| <i>exsC</i> -R | GAAGCATTGAGGGTCAG      |
| <i>pscD</i> -F | GTGCCCTATGTAGTGCTC     |
| <i>pscD</i> -R | CCCTTTGAGATTGATGATGAAA |
| <i>popN</i> -F | GGACATCCTCCAGAGTTC     |
| <i>popN</i> -R | CGAAACGGAAACGTAGTG     |
| <i>pcrR</i> -F | CTGATTCCCTGGTTTCTC     |
| <i>pcrR</i> -R | CAACATCACGATCCAGAC     |
| <i>pscN</i> -F | GAGTTGCTGCTGAAGATC     |
| <i>pscN</i> -R | GTAATCGCTGGTTTCGTG     |
| <i>pscP</i> -F | CAGTTGCAGATCGAGATC     |
| <i>pscP</i> -R | CTGGTTGAAGGTGAGTTG     |

---

**Table S3.** Genes regulated by SpeE

| Gene category and locus          | Gene        | Function                                       | Log <sub>2</sub> Fold change* | P-value  |
|----------------------------------|-------------|------------------------------------------------|-------------------------------|----------|
| <b>Type III secretion system</b> |             |                                                |                               |          |
| <i>PA0044</i>                    | <i>exoT</i> | exoenzyme T                                    | -4.0407                       | 1.61E-40 |
| <i>PA1690</i>                    | <i>pscU</i> | translocation protein in<br>type III secretion | -1.84564                      | 8.22E-08 |
| <i>PA1691</i>                    | <i>pscT</i> | translocation protein in<br>type III secretion | -1.6881                       | 3.15E-06 |
| <i>PA1692</i>                    | <i>pscS</i> | translocation protein in<br>type III secretion | -1.1615                       | 0.00127  |
| <i>PA1693</i>                    | <i>pscR</i> | type III secretion system<br>protein           | -2.48639                      | 8.11E-21 |
| <i>PA1694</i>                    | <i>pscQ</i> | type III secretion system<br>protein           | -4.83682                      | 3.15E-80 |
| <i>PA1695</i>                    | <i>pscP</i> | translocation protein in<br>type III secretion | -3.9592                       | 6.58E-65 |
| <i>PA1696</i>                    | <i>pscO</i> | translocation protein in<br>type III secretion | -1.51427                      | 3.08E-05 |

---

|               |             |                                                   |          |          |
|---------------|-------------|---------------------------------------------------|----------|----------|
| <i>PA1697</i> | <i>pscN</i> | type III secretion system<br>ATPase               | -2.82133 | 1.33E-26 |
| <i>PA1698</i> | <i>popN</i> | type III secretion outer<br>membrane protein PopN | -3.50638 | 8.17E-38 |
| <i>PA1699</i> | <i>pcr1</i> |                                                   | -3.48399 | 6.14E-29 |
| <i>PA1700</i> | <i>pcr2</i> |                                                   | -1.79336 | 7.93E-07 |
| <i>PA1701</i> | <i>pcr3</i> |                                                   | -2.87811 | 1.45E-15 |
| <i>PA1703</i> | <i>pcrD</i> | type III secretory apparatus<br>protein PcrD      | -3.36648 | 8.13E-37 |
| <i>PA1704</i> | <i>pcrR</i> | transcriptional regulator<br>PcrR                 | -1.69947 | 2.88E-06 |
| <i>PA1705</i> | <i>pcrG</i> | type III secretion regulator                      | -1.79839 | 5.07E-07 |
| <i>PA1706</i> | <i>pcrV</i> | type III secretion protein<br>PcrV                | -4.21799 | 1.72E-53 |
| <i>PA1707</i> | <i>pcrH</i> | regulatory protein PcrH                           | -4.43825 | 1.72E-66 |
| <i>PA1708</i> | <i>popB</i> | translocator protein PopB                         | -4.40396 | 1.28E-43 |
| <i>PA1709</i> | <i>popD</i> | translocator outer<br>membrane protein PopD       | -4.69046 | 6.53E-58 |
| <i>PA1710</i> | <i>exsC</i> | exoenzyme S synthesis<br>protein ExsC             | -2.77605 | 1.02E-28 |

---

---

|               |             |                                                   |          |          |
|---------------|-------------|---------------------------------------------------|----------|----------|
| <i>PA1711</i> | <i>exsE</i> | hypothetical protein                              | -1.23985 | 0.000637 |
| <i>PA1712</i> | <i>exsB</i> | exoenzyme S synthesis<br>protein ExsB             | -3.05927 | 3.20E-33 |
| <i>PA1713</i> | <i>exsA</i> | exoenzyme S<br>transcriptional regulator<br>ExsA  | -2.95927 | 3.18E-45 |
| <i>PA1714</i> | <i>exsD</i> | hypothetical protein                              | -2.69083 | 5.99E-34 |
| <i>PA1715</i> | <i>pscB</i> | type III export apparatus<br>protein              | -2.86764 | 2.59E-19 |
| <i>PA1716</i> | <i>pscC</i> | type III secretion outer<br>membrane protein PscC | -2.96911 | 2.09E-43 |
| <i>PA1717</i> | <i>pscD</i> | type III export protein<br>PscD                   | -2.67178 | 5.81E-24 |
| <i>PA1718</i> | <i>pscE</i> | type III export protein<br>PscE                   | -2.06817 | 1.07E-08 |
| <i>PA1719</i> | <i>pscF</i> | type III export protein PscF                      | -2.09228 | 1.42E-12 |
| <i>PA1721</i> | <i>pscH</i> | type III export protein<br>PscH                   | -3.28022 | 1.82E-34 |
| <i>PA1722</i> | <i>pscI</i> | type III export protein PscI                      | -2.69414 | 1.20E-17 |
| <i>PA1723</i> | <i>pscJ</i> | type III export protein PscJ                      | -3.0222  | 1.35E-38 |

---

---

|                                                      |               |                                                   |          |          |
|------------------------------------------------------|---------------|---------------------------------------------------|----------|----------|
| <i>PA1724</i>                                        | <i>pscK</i>   | type III export protein<br>PscK                   | -1.78256 | 5.53E-07 |
| <i>PA1725</i>                                        | <i>pscL</i>   | type III secretion system<br>protein              | -2.38542 | 3.41E-18 |
| <i>PA2191</i>                                        | <i>exoY</i>   | adenylate cyclase                                 | -4.18803 | 1.37E-60 |
| <i>PA3841</i>                                        | <i>exoS</i>   | exoenzyme S                                       | -4.30902 | 6.72E-47 |
| <i>PA3842</i>                                        | <i>spcS</i>   | chaperone                                         | -3.71998 | 7.50E-36 |
| <b>Type VI secretion system</b>                      |               |                                                   |          |          |
| <i>PA2266</i>                                        | <i>hcpB</i>   | secreted protein Hcp                              | 1.002003 | 0.000627 |
| <b>Flagellar synthesis, motility, and chemotaxis</b> |               |                                                   |          |          |
| <i>PA1100</i>                                        | <i>fliE</i>   | flagellar hook-basal body<br>complex protein FliE | 1.085368 | 4.45E-05 |
| <i>PA0175</i>                                        | <i>PA0175</i> | chemotaxis protein<br>methyltransferase           | -1.08066 | 0.000668 |
| <b>Two-component system</b>                          |               |                                                   |          |          |
| <i>PA0178</i>                                        | <i>PA0178</i> | two-component sensor                              | -1.06677 | 0.00012  |
| <b>Transporter</b>                                   |               |                                                   |          |          |
| <i>PA0913</i>                                        | <i>mgtE</i>   | Mg transporter MgtE                               | 1.004179 | 6.44E-06 |

---

---

|                                  |               |                                                                    |          |          |
|----------------------------------|---------------|--------------------------------------------------------------------|----------|----------|
| <i>PA2339</i>                    | <i>PA2339</i> | binding-protein-dependent<br>maltose/mannitol transport<br>protein | -1.12311 | 0.000549 |
| <b>Metabolic pathway</b>         |               |                                                                    |          |          |
| <i>PA0654</i>                    | <i>speD</i>   | S-adenosylmethionine<br>decarboxylase                              | 1.282675 | 1.57E-07 |
| <i>PA2165</i>                    | <i>PA2165</i> | glycogen synthase                                                  | -1.18938 | 3.14E-06 |
| <i>PA2265</i>                    | <i>PA2265</i> | gluconate dehydrogenase                                            | -1.09456 | 1.09E-05 |
| <i>PA2323</i>                    | <i>PA2323</i> | glyceraldehyde-3-<br>phosphate dehydrogenase                       | -1.28194 | 4.34E-05 |
| <i>PA2378</i>                    | <i>PA2378</i> | aldehyde dehydrogenase                                             | -1.41253 | 2.94E-10 |
| <i>PA2887</i>                    | <i>atuB</i>   | citronellol catabolism<br>dehydrogenase                            | -1.32205 | 4.84E-05 |
| <i>PA3459</i>                    | <i>PA3459</i> | glutamine amidotransferase                                         | -1.33493 | 1.34E-08 |
| <i>PA3460</i>                    | <i>PA3460</i> | acetyltransferase                                                  | -1.07438 | 2.44E-06 |
| <i>PA5297</i>                    | <i>poxB</i>   | pyruvate dehydrogenase                                             | -1.04373 | 3.37E-06 |
| <b>Ribosome</b>                  |               |                                                                    |          |          |
| <i>PA4567</i>                    | <i>rpmA</i>   | 50S ribosomal protein L27                                          | 1.070204 | 0.000578 |
| <i>PA4932</i>                    | <i>rplI</i>   | 50S ribosomal protein L9                                           | 1.024404 | 0.000979 |
| <b>Oxidative phosphorylation</b> |               |                                                                    |          |          |

---

---

|                             |               |                                     |          |          |
|-----------------------------|---------------|-------------------------------------|----------|----------|
| <i>PA1173</i>               | <i>napB</i>   | cytochrome C protein<br>NapB        | -1.21736 | 0.000551 |
| <i>PA2266</i>               | <i>PA2266</i> | cytochrome C                        | -1.1583  | 3.27E-07 |
| <i>PA3621</i>               | <i>fdxA</i>   | ferredoxin I                        | 1.095163 | 2.32E-07 |
| <b>Others</b>               |               |                                     |          |          |
| <i>PA0617</i>               | <i>PA0617</i> | bacteriophage protein               | 1.049665 | 2.74E-05 |
| <i>PA1985</i>               | <i>pqqA</i>   | coenzyme PQQ synthesis<br>protein A | -1.32691 | 0.000198 |
| <i>PA2113</i>               | <i>opdO</i>   | pyroglutamate porin<br>OpdO         | -1.19634 | 1.61E-06 |
| <i>PA4138</i>               | <i>tyrS</i>   | tyrosine--tRNA ligase               | 1.46434  | 1.01E-07 |
| <b>Hypothetical protein</b> |               |                                     |          |          |
| <i>PA0126</i>               | <i>PA0126</i> | hypothetical protein                | 1.07916  | 1.11E-05 |
| <i>PA0170</i>               | <i>PA0170</i> | hypothetical protein                | 1.477056 | 1.04E-05 |
| <i>PA0645</i>               | <i>PA0645</i> | hypothetical protein                | 1.030982 | 0.00055  |
| <i>PA0788</i>               | <i>PA0788</i> | hypothetical protein                | 1.283784 | 5.25E-05 |
| <i>PA1791</i>               | <i>PA1791</i> | hypothetical protein                | 1.066776 | 6.66E-06 |
| <i>PA2109</i>               | <i>PA2109</i> | hypothetical protein                | -1.53548 | 2.25E-08 |
| <i>PA2110</i>               | <i>PA2110</i> | hypothetical protein                | -1.18739 | 3.95E-05 |
| <i>PA2111</i>               | <i>PA2111</i> | hypothetical protein                | -1.82219 | 5.38E-15 |

---

---

|               |               |                      |          |          |
|---------------|---------------|----------------------|----------|----------|
| <i>PA2112</i> | <i>PA2112</i> | hypothetical protein | -1.27843 | 8.55E-07 |
| <i>PA2312</i> | <i>PA2312</i> | hypothetical protein | -1.33468 | 0.00011  |
| <i>PA2459</i> | <i>PA2459</i> | hypothetical protein | 1.049656 | 0.000162 |
| <i>PA2708</i> | <i>PA2708</i> | hypothetical protein | -1.19019 | 6.13E-05 |
| <i>PA3282</i> | <i>PA3282</i> | hypothetical protein | -1.0454  | 0.000322 |
| <i>PA3785</i> | <i>PA3785</i> | hypothetical protein | -1.04675 | 3.18E-06 |
| <i>PA3939</i> | <i>PA3939</i> | hypothetical protein | 1.024211 | 0.000547 |
| <i>PA4013</i> | <i>PA4013</i> | hypothetical protein | 1.01834  | 0.001185 |
| <i>PA4507</i> | <i>PA4507</i> | hypothetical protein | 1.195463 | 0.00038  |
| <i>PA4580</i> | <i>PA4580</i> | hypothetical protein | 1.040726 | 8.27E-05 |

---

\*Fold changes of gene expression were calculated compared with those in the wild-type strain PAO1.



## Supplementary Figure S1

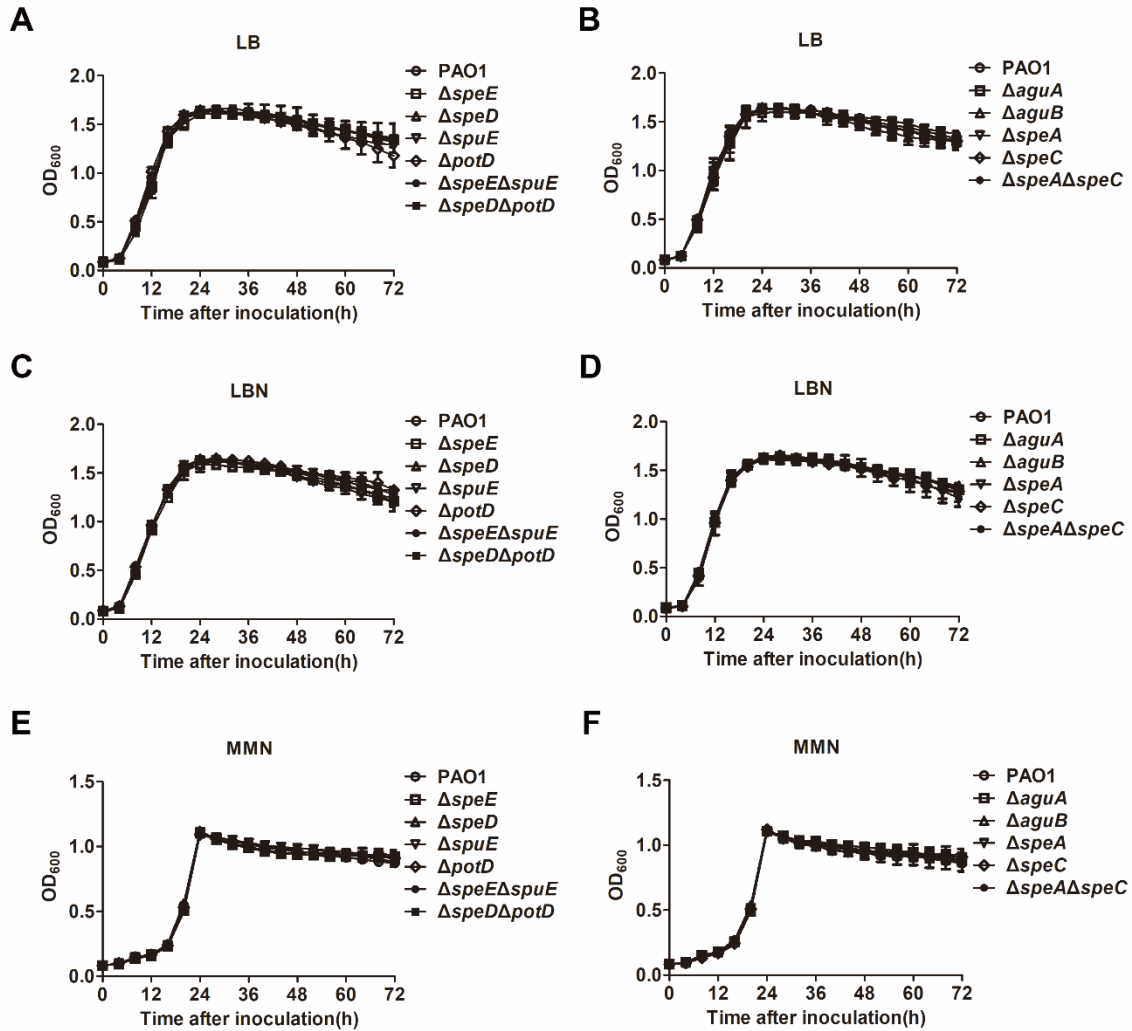

**Supplementary Figure S1. Bacterial growth of *Pseudomonas aeruginosa* PAO1 and its derivatives in different media.** The wild-type strain PAO1 and its derivatives were cultured in LB (A and B), LBN (C and D), and MMN (E and F) as indicated. Each assay was performed at least triplicates and error bars indicate standard deviations.

## Supplementary Figure S2

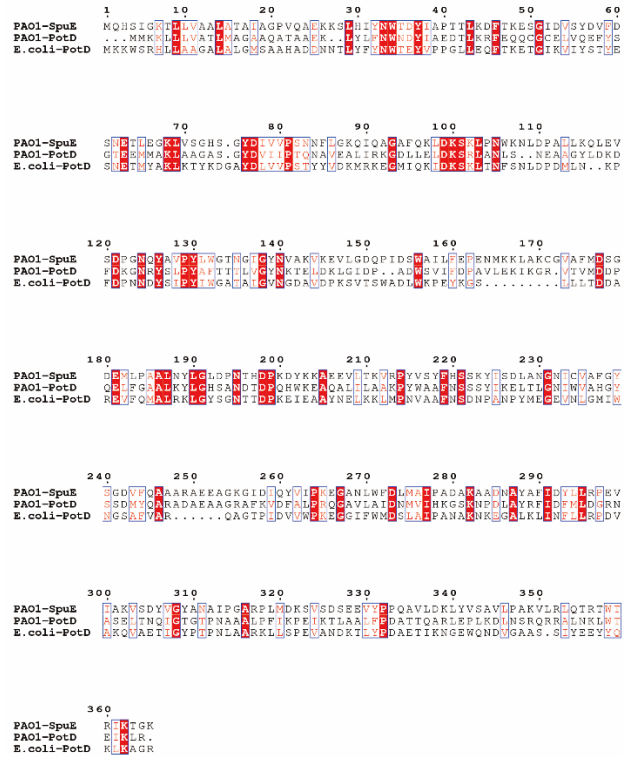

Supplementary Figure S2. Sequence alignment of SpuE and PotD from *Pseudomonas aeruginosa* PAO1 compared with the spermidine binding protein PotD in *Escherichia coli*.

### Supplementary Figure S3

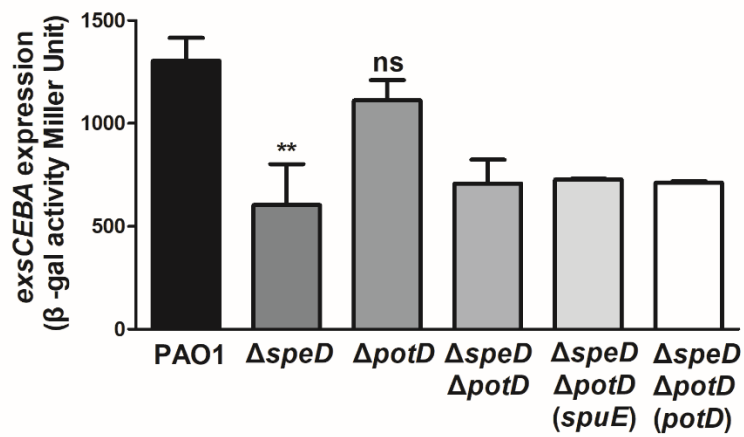

**Supplementary Figure S3. Transcriptional expression of *exsCEBA* in *Pseudomonas aeruginosa* PAO1 and its derivatives in MMN medium.** The expression of *exsCEBA* was determined in  $\Delta speD \Delta potD$  with *in trans* expression of *spuE* or *potD*, respectively. Each assay was in at least triplicates and error bars indicate standard deviations. Statistics significance: ns, no significance, \*\*,  $P < 0.01$ . Statistical analysis compared to wild-type strain PAO1 was performed by using Student's *t* test.

## Supplementary Figure S4

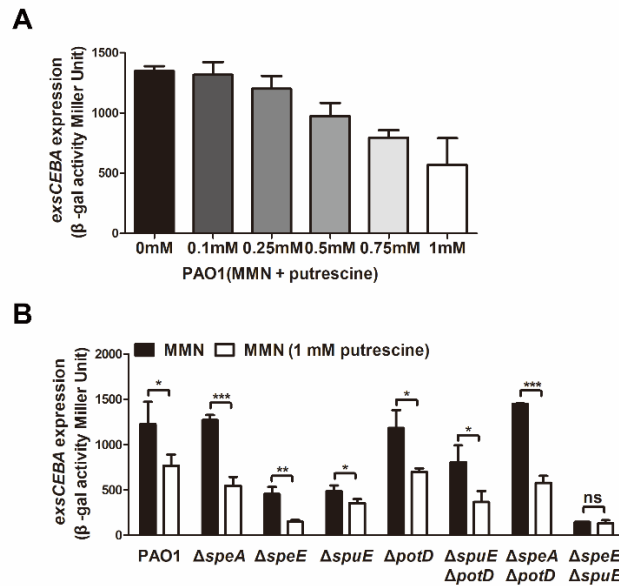

**Supplementary Figure S4 Transcriptional expression of *exsCEBA* in *Pseudomonas aeruginosa* PAO1 and its derivatives with or without putrescine.** (A) Dosage effect of putrescine on expression of T3SS *exsCEBA* genes in *P. aeruginosa* PAO1 cultured in MMN medium. (B) Effect of 1 mM putrescine on expression of *exsCEBA* in *P. aeruginosa* PAO1 and derivatives. Each assay was performed at least triplicates and error bars indicate standard deviations. Statistics significance: ns, no significance, \*,  $P < 0.05$ ; \*\*,  $P < 0.01$ ; \*\*\*,  $P < 0.001$ . Statistical comparison of strains in MMN and MMN (1 mM putrescine) was performed by using Student's *t* test.

## Supplementary Figure S5

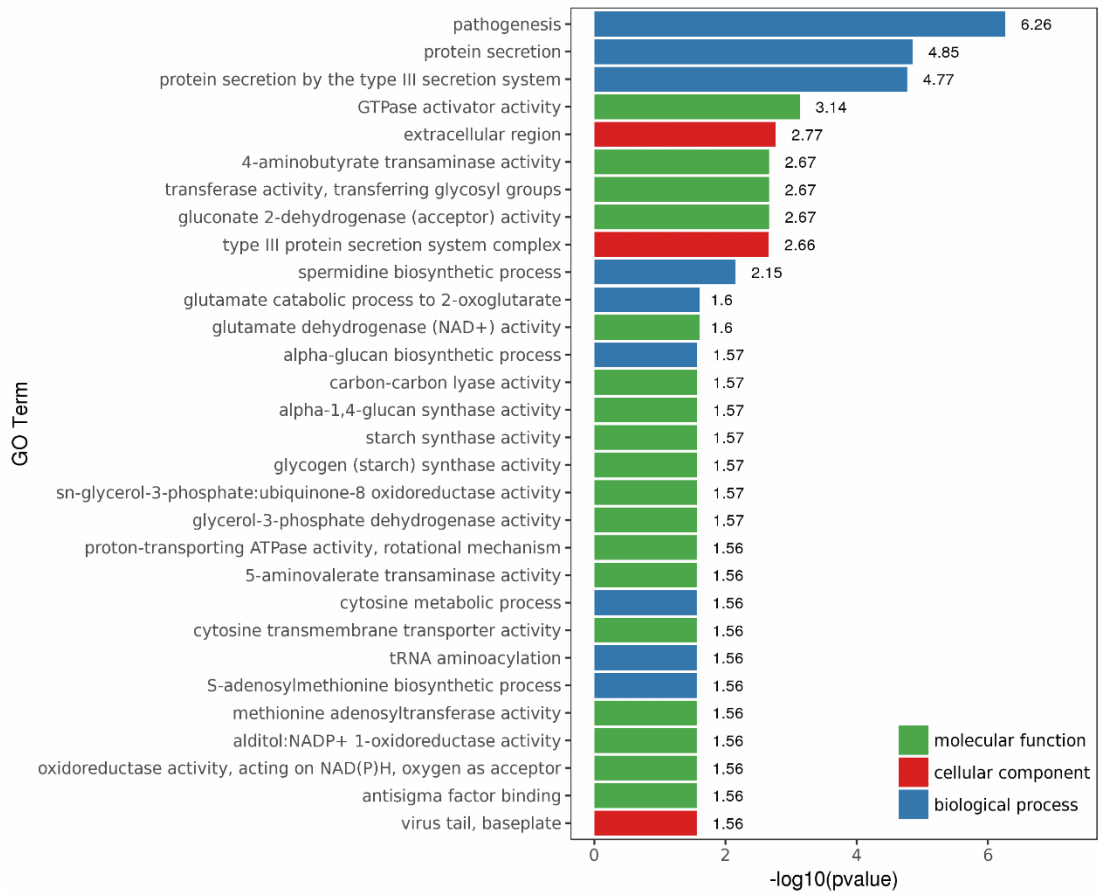

## Supplementary Figure S5. Gene ontology analysis of differentially expressed genes

between *Pseudomonas aeruginosa* PAO1 and mutant  $\Delta$ *speE*.

Supplementary Figure S6

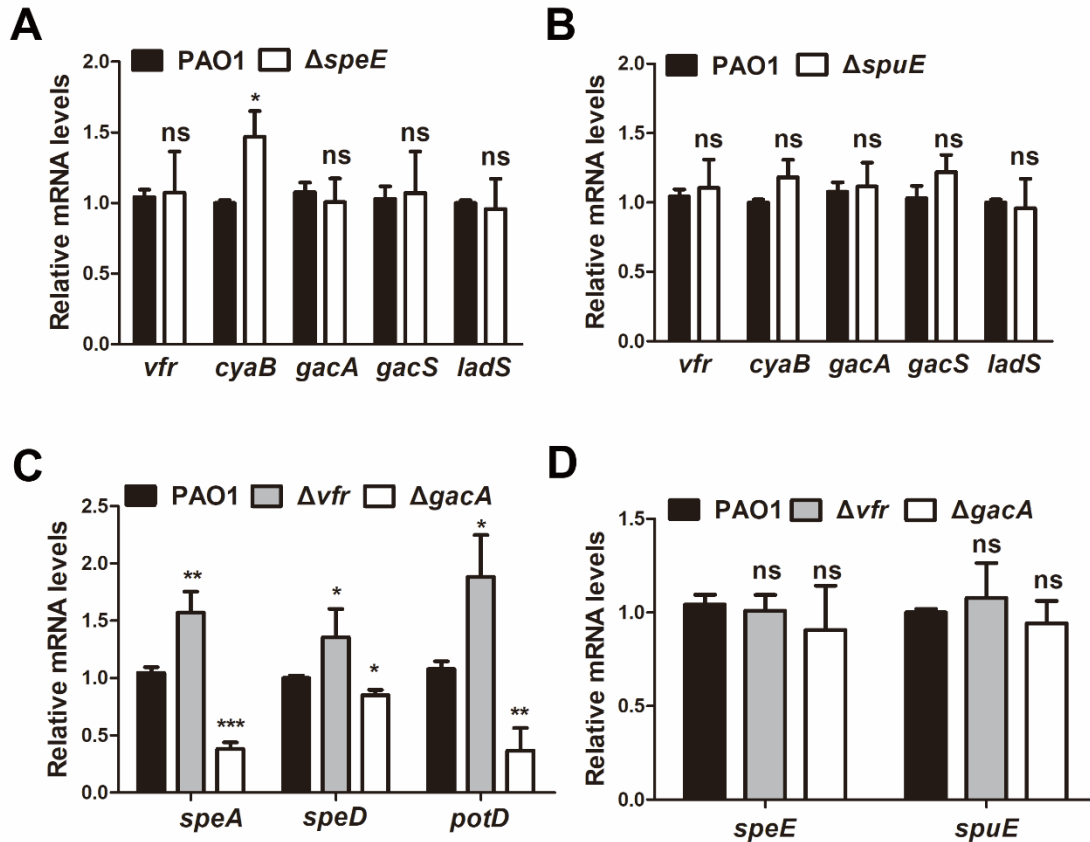

Supplementary Figure S6 Interaction of spermidine-related genes with other T3SS

regulatory mechanisms in *Pseudomonas aeruginosa* PAO1. (A) RT-qPCR analysis of

the expression levels of *vfr*, *cyaB*, *gacA*, *gacS*, and *ladS* in wild-type strain PAO1 and

mutant  $\Delta$ speE. (B) RT-qPCR analysis of the expression levels of *vfr*, *cyaB*, *gacA*, *gacS*, and

*ladS* in wild-type strain PAO1 and mutant  $\Delta$ spuE. (C) RT-qPCR analysis of the expression

levels of *speA*, *speD*, and *potD* in wild-type strain PAO1,  $\Delta$ vfr, and  $\Delta$ gacA mutants. (D)

RT-qPCR analysis of the expression levels of *speE* and *spuE* in wild-type strain PAO1,

$\Delta$ vfr, and  $\Delta$ gacA mutants. Total RNAs were collected when bacteria were grown to an

OD<sub>600</sub> of 1.2. The *rpoD* gene was used as an internal control. The experiment was repeated

at least triplicates in each assay. The error bars indicate standard deviations. Statistics significance: ns, no significance, \*,  $P < 0.05$ ; \*\*,  $P < 0.01$ ; \*\*\*,  $P < 0.001$ . Statistical comparison to wild-type strain PAO1 was performed by using Student's t test.

**Supplementary Figure S7**

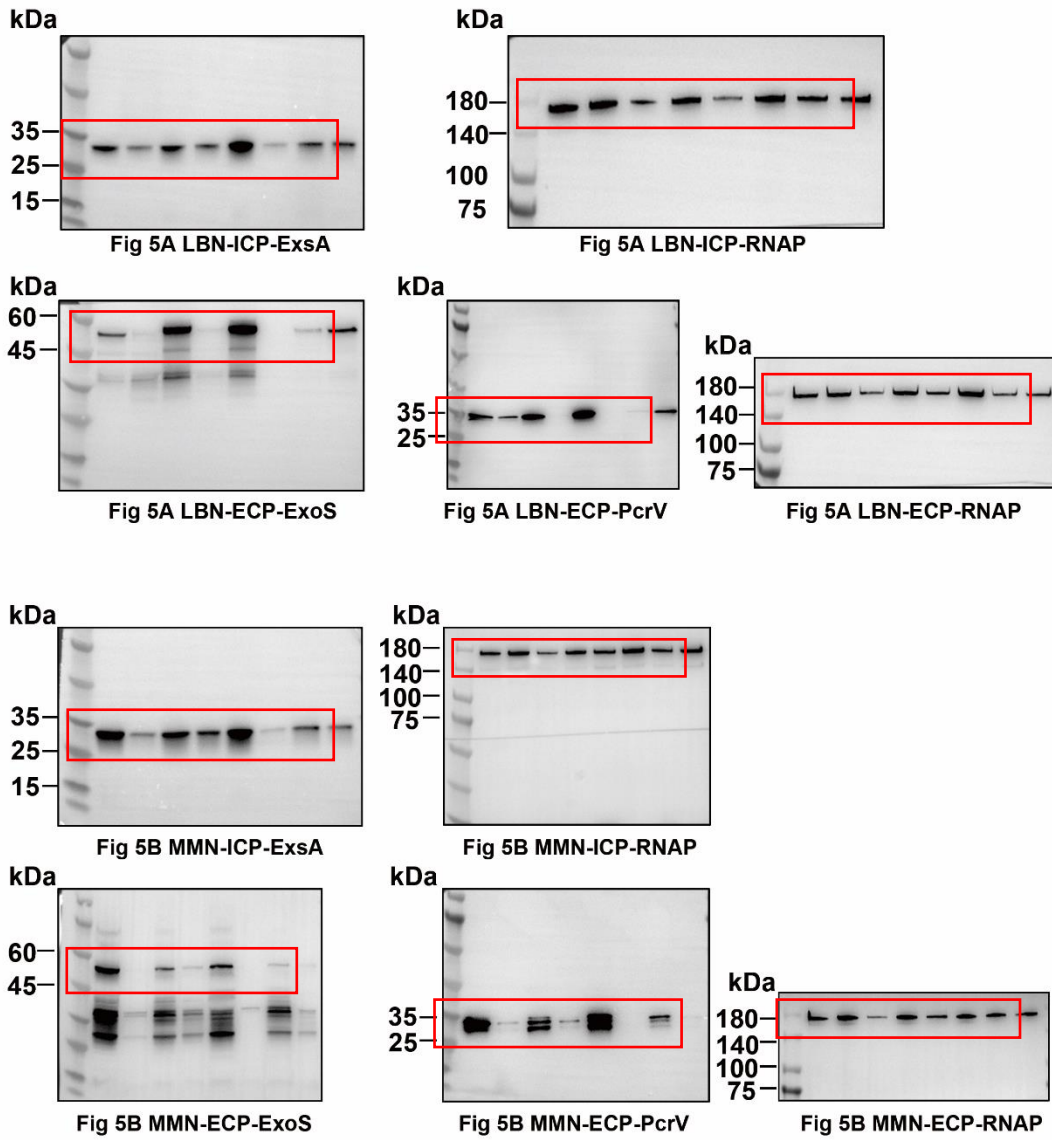

**Supplementary Figure S7 Full images of the Western blots used in this study. The magenta frames indicate the cropped parts.**
